# Supplementary material for: Piezoelectric energy harvesting of a bismuth halide perovskite stabilised by chiral ammonium cations
Source: Royal Society of Chemistry journal article supplement (doi:10.1039/d2ce00866a), 2022-01-01
Supplement: d2ce00866a1.pdf [file d2ce00866a1.pdf]

## Supporting information

# Piezoelectric Energy Harvesting of a Bismuth Halide Perovskite Stabilised by Chiral Ammonium Cations

Supriya Sahoo, Nilotpal Deka, Ramamoorthy Boomishankar\*

Department of Chemistry and Centre for Energy Science, Indian Institute of Science Education and Research (IISER), Pune, Dr. Homi Bhabha Road, Pune – 411008, India  
CCDC No. 2181247 (1-S-298 K) & 2181248 (1-S-100 K)

### Table of contents

| S.No. | Details                                                    | Page No. |
|-------|------------------------------------------------------------|----------|
| 1     | X-ray crystallographic information                         | 2-3      |
| 2     | Characterisations                                          | 4-5      |
| 3     | Dielectric studies                                         | 4        |
| 4     | <b>1-S</b> -PLA composites and their Piezoelectric studies | 5-10     |
| 5     | References                                                 | 11       |

**Table S1.** X-ray Crystallographic data for **1-S**.

| Crystallographic details               | <b>1-S</b>                                                        | <b>1-S</b>                                                        |
|----------------------------------------|-------------------------------------------------------------------|-------------------------------------------------------------------|
| Chemical formula                       | C <sub>18</sub> H <sub>28</sub> Br <sub>5</sub> N <sub>2</sub> Bi | C <sub>18</sub> H <sub>28</sub> Br <sub>5</sub> N <sub>2</sub> Bi |
| Formula weight (g/mol)                 | 880.95                                                            | 880.95                                                            |
| Temperature                            | 100(2)K                                                           | 298(2)K                                                           |
| Crystal system                         | Orthorhombic                                                      | Orthorhombic                                                      |
| Space group                            | <i>P</i> <sub>212121</sub>                                        | <i>P</i> <sub>212121</sub>                                        |
| a (Å); α (°)                           | 7.903(2); 90                                                      | 8.016(3); 90                                                      |
| b (Å); β (°)                           | 14.943(4); 90                                                     | 15.184(7); 90                                                     |
| c (Å); γ (°)                           | 21.449(6); 90                                                     | 21.635(9); 90                                                     |
| V (Å <sup>3</sup> ); Z                 | 2533.0(12); 4                                                     | 2633.4(19); 4                                                     |
| ρ (calc.) g cm <sup>-3</sup>           | 2.310                                                             | 2.222                                                             |
| μ(Mo K <sub>α</sub> ) mm <sup>-1</sup> | 14.854                                                            | 14.288                                                            |
| 2θ <sub>max</sub> (°)                  | 50.04                                                             | 54.04                                                             |
| R(int)                                 | 0.2107                                                            | 0.1010                                                            |
| Completeness to θ                      | 99.8                                                              | 99.7                                                              |
| Data / param.                          | 4478/242                                                          | 4648/241                                                          |
| GOF                                    | 1.102                                                             | 1.123                                                             |
| R1 [F > 4σ(F)]                         | 0.0773                                                            | 0.0448                                                            |
| wR2 (all data)                         | 0.0933                                                            | 0.0764                                                            |
| max. peak/hole (e.Å <sup>-3</sup> )    | 1.481/-1.522                                                      | 1.483/-1.306                                                      |

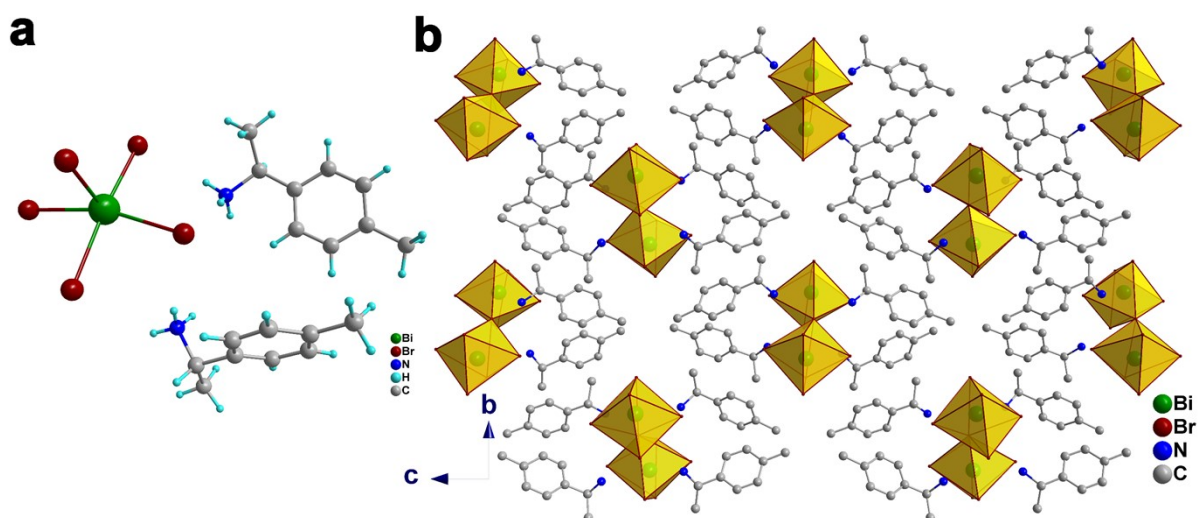**Figure S1.** (a) Asymmetric unit and (b) packing diagram of **1-S** along a-axis at 100 K.

**Table S2.** Hydrogen bonding parameters for **1-S**.

| D-H...A            | d(H...A) Å  | d(D-A) Å      | $\angle(\text{DHA})$ | Symmetry transformations to generate equivalent atoms |
|--------------------|-------------|---------------|----------------------|-------------------------------------------------------|
| N(11)-H(11D)...Br4 | 2.5205(25)Å | 3.4234(238) Å | 172.887(1492)        | -0.5+x, 0.5-y, 1-z                                    |
| N(11)-H(11F)...Br2 | 2.5862(26)Å | 3.4088(214) Å | 150.45(129)          | 0.5+x, 0.5-y, 1-z                                     |
| N(21)-H(21D)...Br4 | 2.6226(26)Å | 3.4911(255) Å | 159.588(1597)        | -0.5+x, 0.5-y, 1-z                                    |
| N(21)-H(21F)...Br1 | 2.5001(32)Å | 3.3726(239) Å | 161.443(1499)        | -0.5+x, 0.5-y, 1-z                                    |

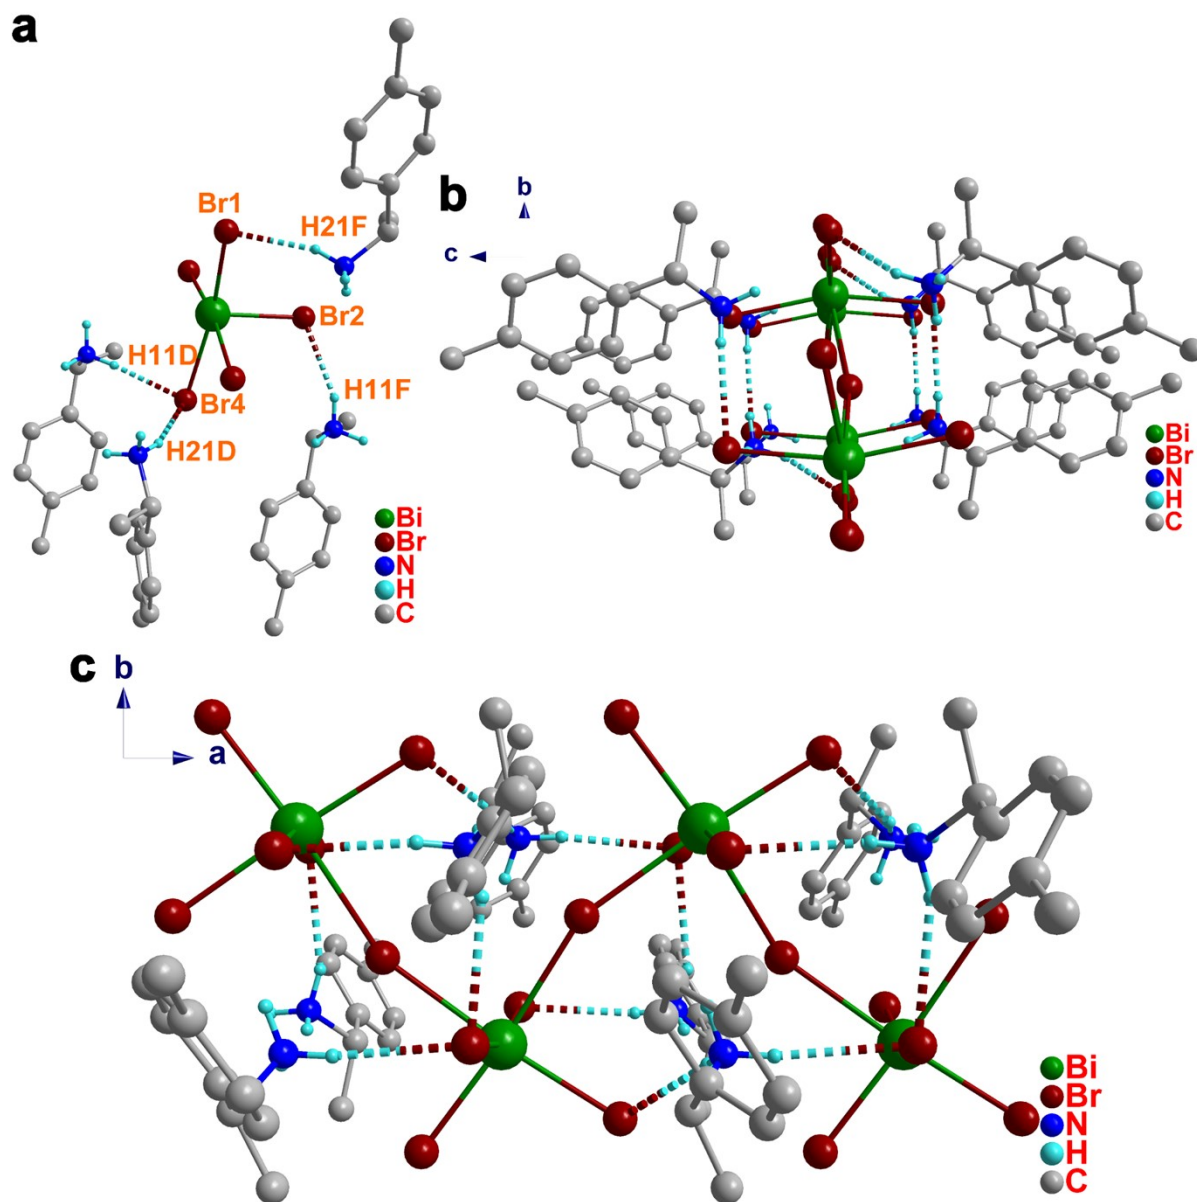

**Figure S2.** Non-classical N-H...Br hydrogen bonding interactions in **1-S** at 100 K.

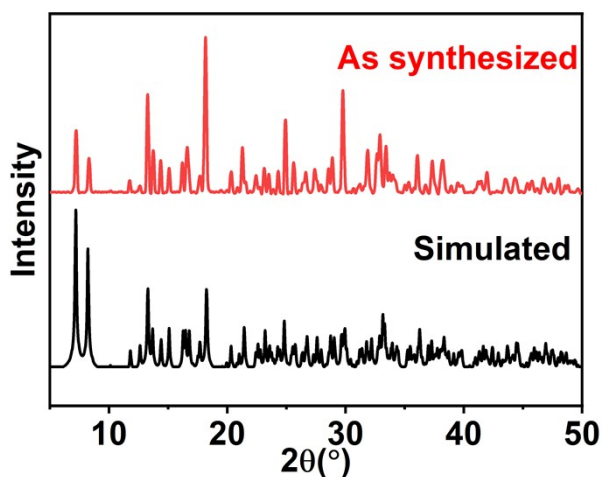

Figure S3. The powder X-ray diffraction (PXRD) profile of 1-S.

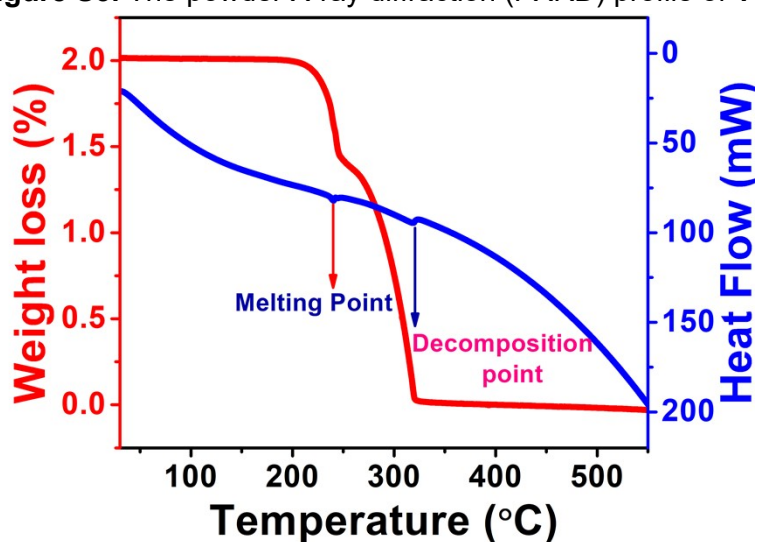

Figure S4. The thermogravimetric and differential thermal analysis profiles of 1-S.

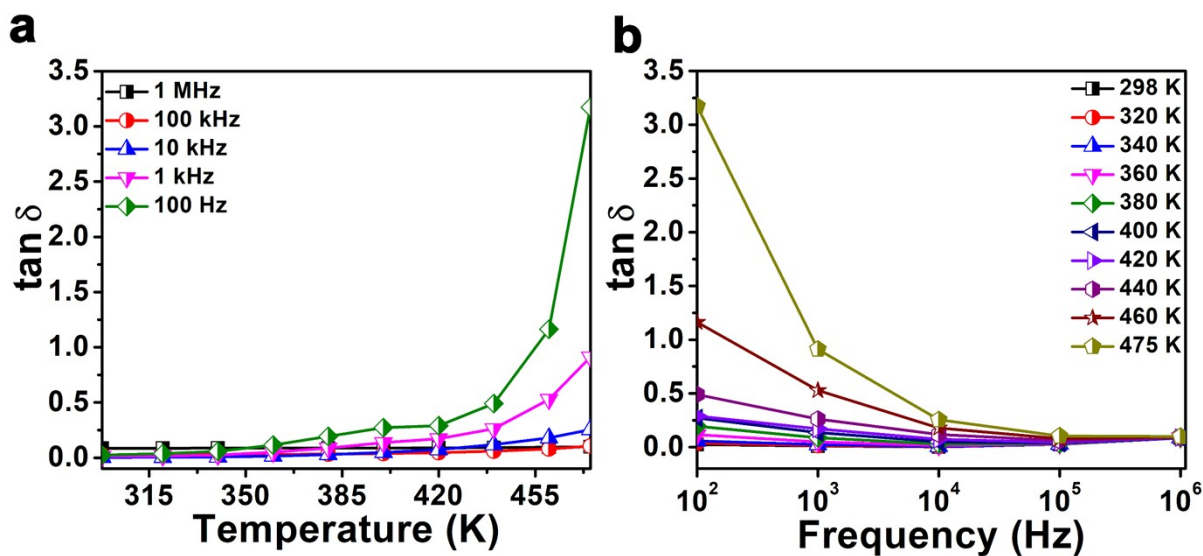

Figure S5. (a) Temperature dependant dielectric loss plot and (b) Frequency dependant dielectric loss plot of 1-S.

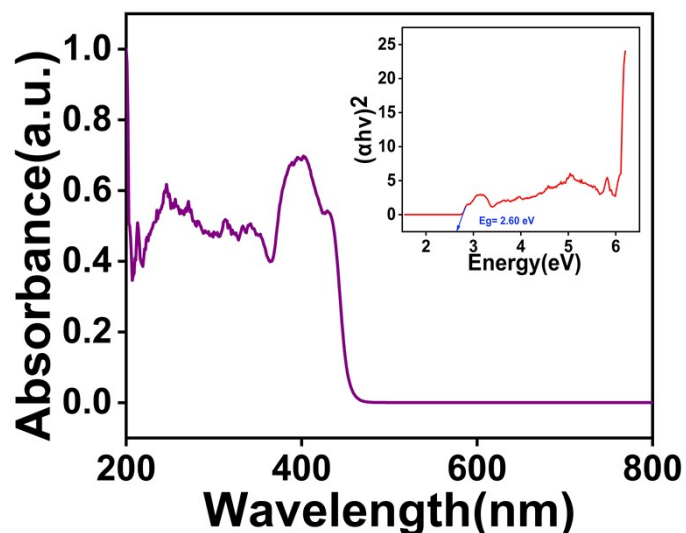

**Figure S6.** UV-Visible diffuse reflectance spectrum of **1-S**; its corresponding Tauc plot is displayed in the inset.

**Table S3.** Details about the preparation of various weight percentage (wt %) **1-S**-PLA composites.

| Composite (wt%) | 1-S (in mg) | 1-S + PLA (in mg) |
|-----------------|-------------|-------------------|
| 5 wt%           | 28.94       | 578.94            |
| 10 wt%          | 61.11       | 611.11            |
| 15 wt%          | 97.05       | 647.05            |
| 20 wt%          | 137.50      | 687.50            |

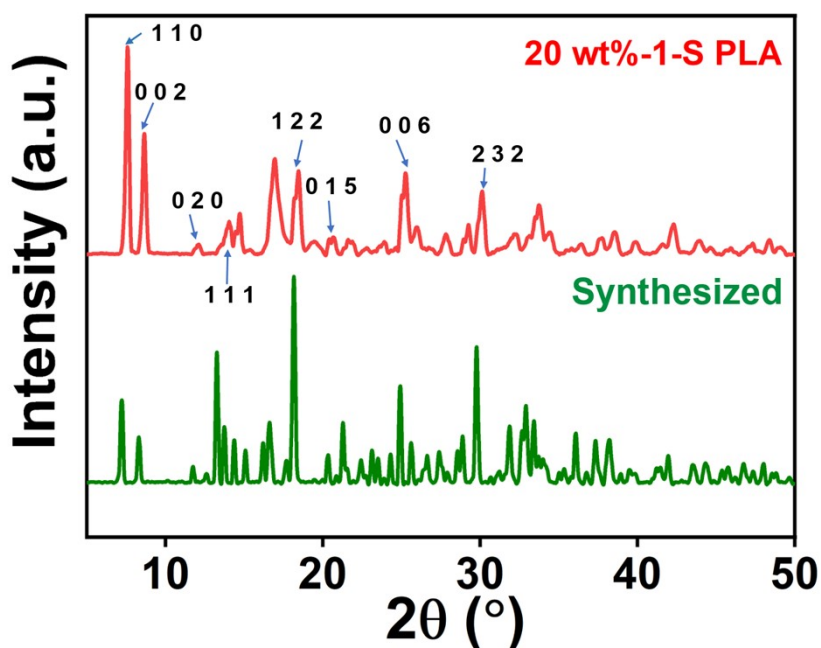

**Figure S7.** The powder X-ray diffraction pattern and the characteristic  $hkl$  peaks for compound **1-S** and the 20 wt % **1-S**-PLA.

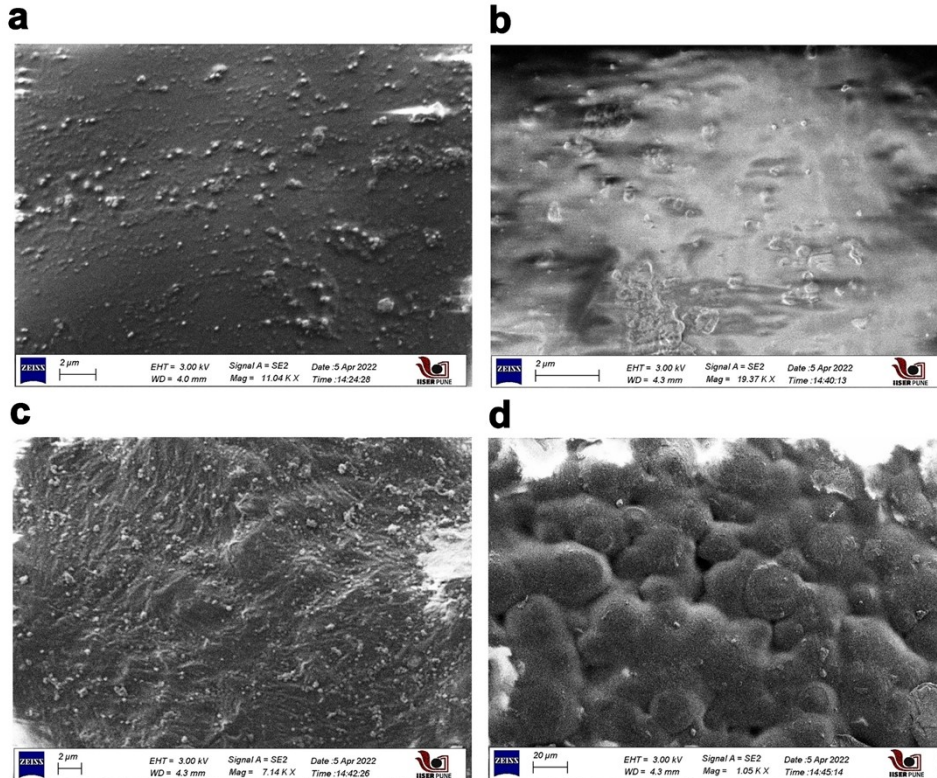

**Figure S8.** The FE-SEM images of 1-S-PLA composites. The figures a, b, c, and d correspond to 5, 10, 15, and 20 wt % 1-S-PLA composites respectively.

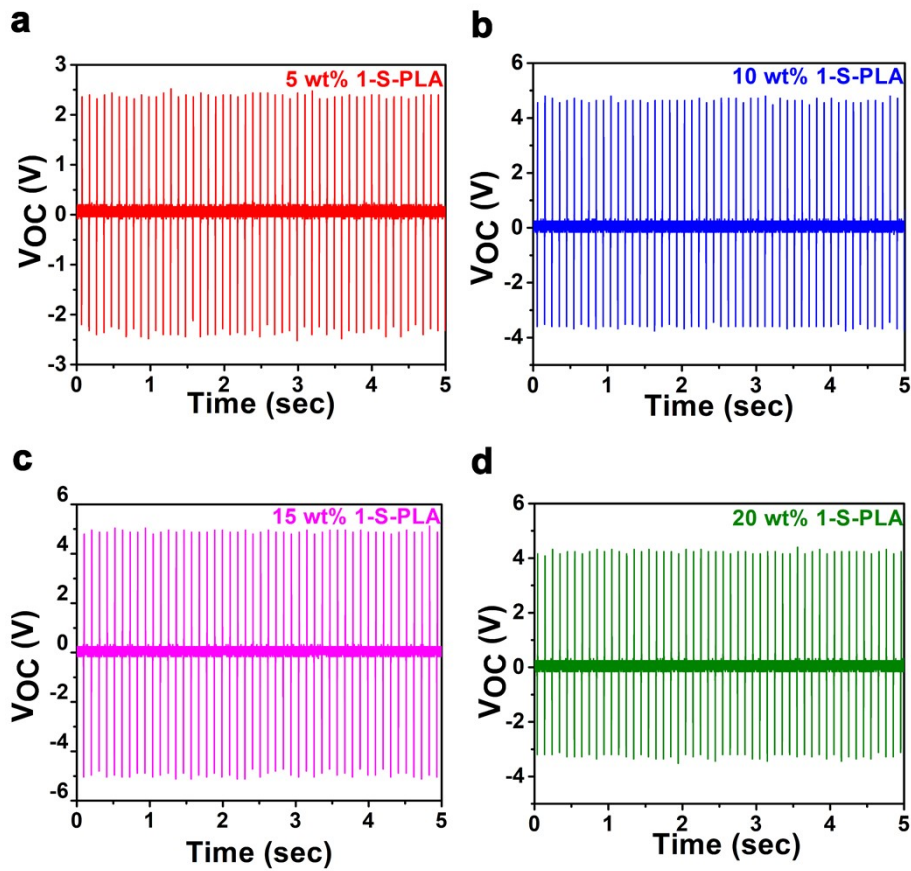

**Figure S9.** Output voltage profiles of all the 1-S-PLA composite films.

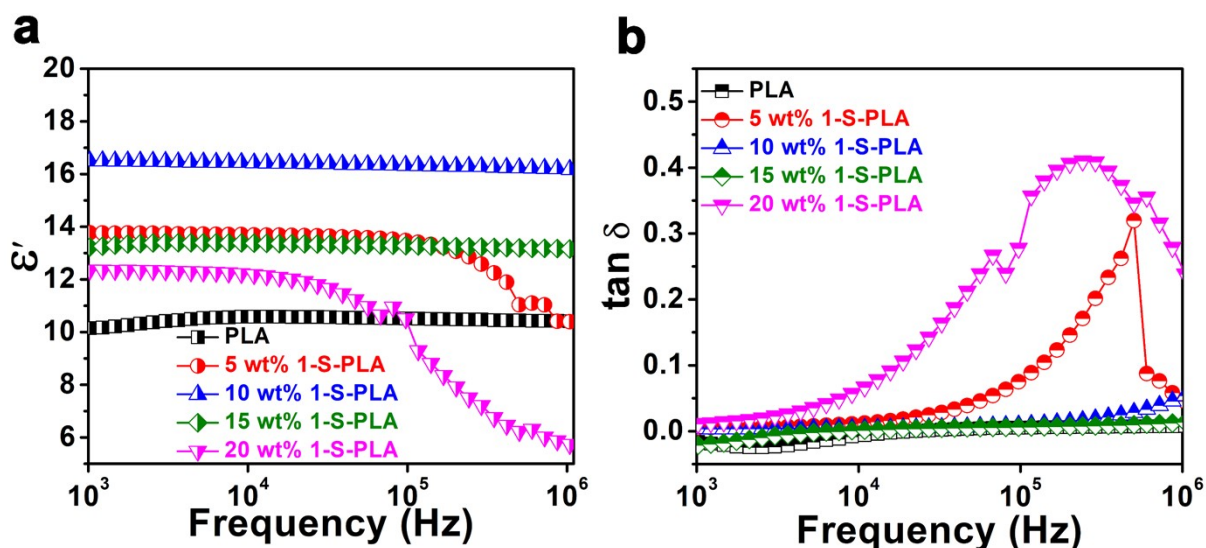

**Figure S10.** Frequency dependent dielectric permittivity and (b) Frequency dependent dielectric loss plot of neat PLA and all 1-S-PLA films.

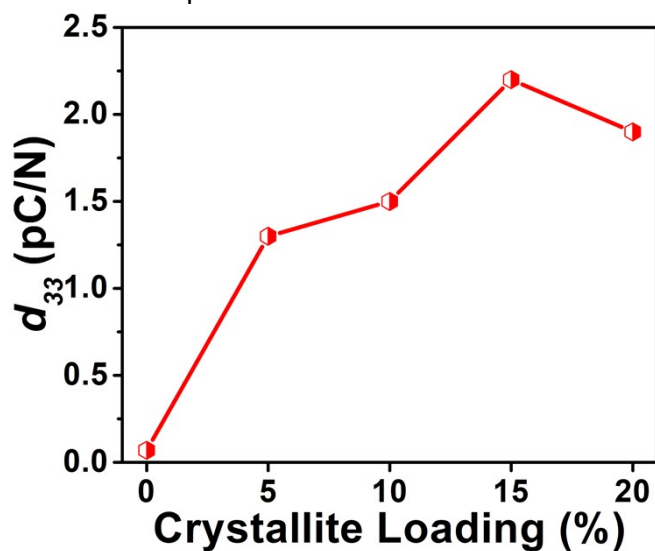

**Figure S11.** The comparative  $d_{33}$  values for all 1-S-PLA composite films and neat PLA film. The solid lines the connecting the points are a guide the eye.

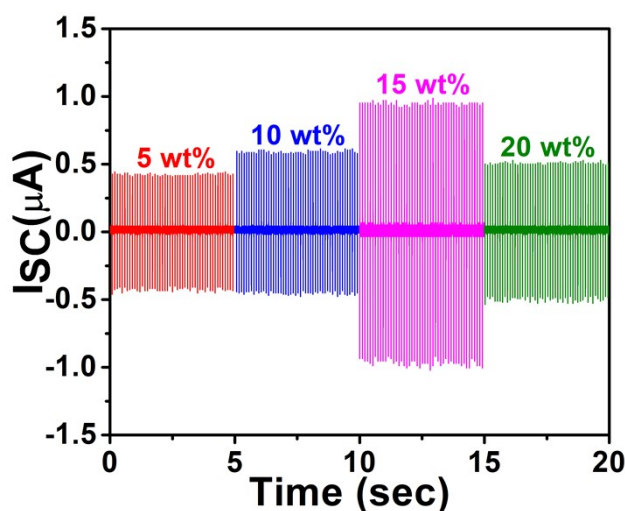

**Figure S12.** Output current profile of 1-S-PLA composite films.

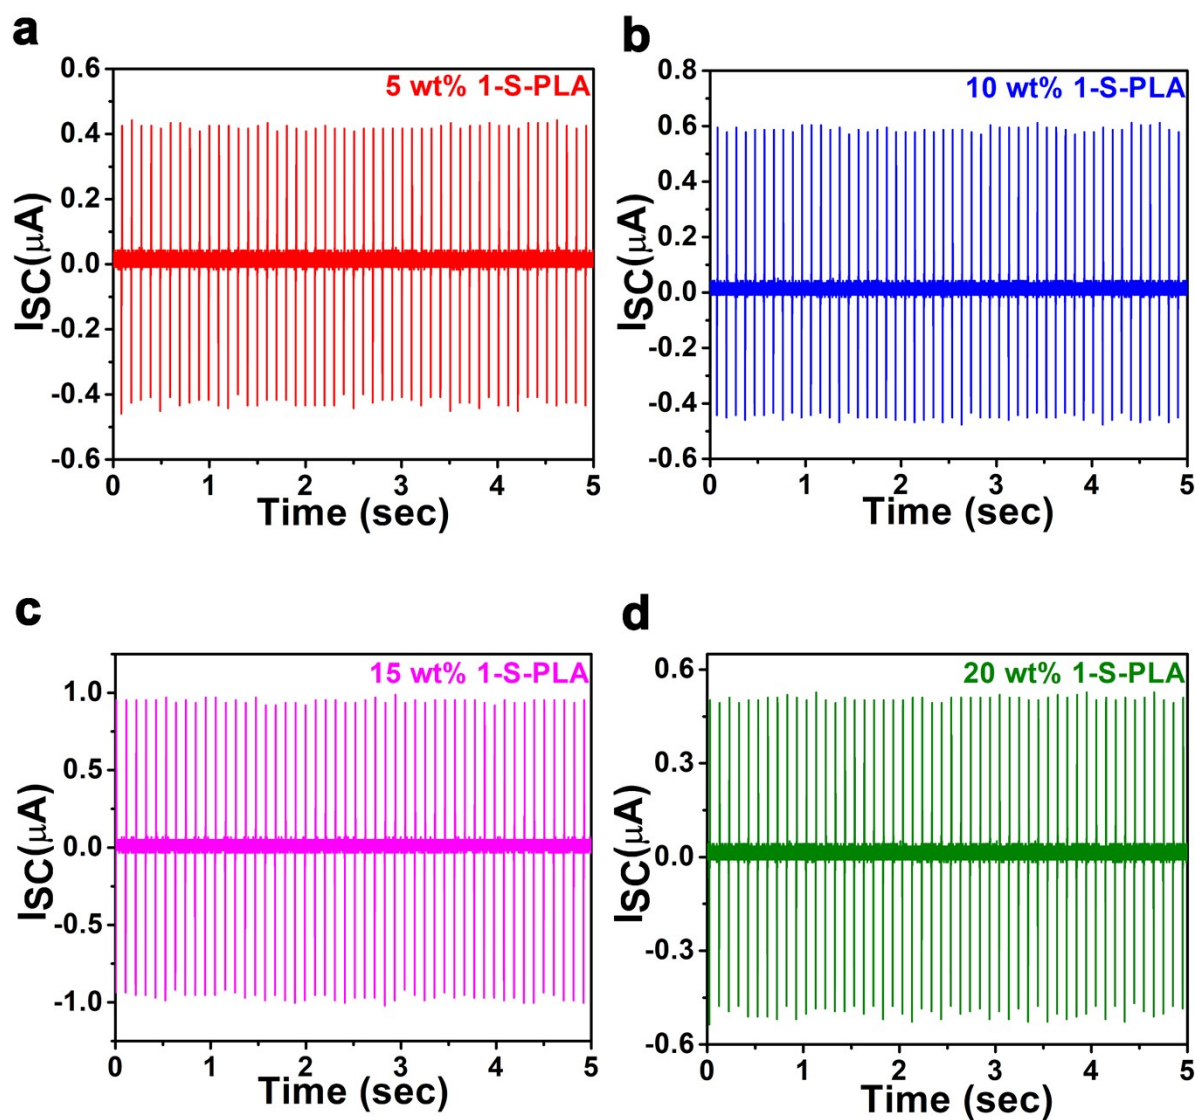

**Figure S13.** The calculated output currents of all the 1-S-PLA composite films.

**Table S4.** Summary of maximum piezoelectric energy harvesting outputs of 15 wt% 1-S-PLA composite devices.

| Parameters                             | Energy Harvesting Outputs    |
|----------------------------------------|------------------------------|
| Area of the Device                     | 3.6 cm <sup>2</sup>          |
| Maximum $V_{pp}$                       | 10.4 V                       |
| Maximum $I_{pp}$                       | 2.2 $\mu$ A                  |
| Maximum CD                             | 0.5 $\mu$ A/cm <sup>2</sup>  |
| Maximum PD                             | 5.26 $\mu$ W/cm <sup>2</sup> |
| Energy Stored in 100 $\mu$ F Capacitor | 58.25 $\mu$ J                |
| Charge Stored in 100 $\mu$ F Capacitor | 116.5 $\mu$ C                |



**Table S5.** Comparison of output device performances of known energy harvesters based on polymer composites of organic-inorganic hybrid materials.

| Hybrid Composite Devices                                                  | Output Voltages | Current/Current density                     | Power/Power density                                        | Active area                   | References       |
|---------------------------------------------------------------------------|-----------------|---------------------------------------------|------------------------------------------------------------|-------------------------------|------------------|
| MAPbI <sub>3</sub> -PVDF                                                  | 9.43            | 0.76 $\mu\text{A cm}^{-2}$                  | -                                                          | 1 x 1 cm <sup>2</sup>         | <sup>1</sup>     |
| MAPbBr <sub>3</sub> -PVDF                                                 | 5               | 60 nA                                       | 0.28 $\mu\text{W cm}^{-2}$                                 | 2.4 x 1.5 cm <sup>2</sup>     | <sup>2</sup>     |
| MAPbI <sub>3</sub> -PDMS                                                  | 1.0             | 50 nA cm <sup>-2</sup>                      | -                                                          | 1 x 1 cm <sup>2</sup>         | <sup>3</sup>     |
| FAPbBr <sub>3</sub> -PDMS                                                 | 4               | -                                           | -                                                          | 1 x 1 cm <sup>2</sup>         | <sup>4</sup>     |
| CsPbBr <sub>3</sub> /PVDF                                                 | 10.3            | 1.29 $\mu\text{A cm}^{-2}$                  | 3.31 $\mu\text{W}$                                         | 1 x 1 cm <sup>2</sup>         | <sup>5</sup>     |
| PVDF-PLLA-SnO <sub>2</sub> NF-MAPbI <sub>3</sub>                          | 4.82            | 29.7 nA                                     | -                                                          | 0.25 x 0.25 cm <sup>2</sup>   | <sup>6</sup>     |
| SnO <sub>2</sub> NF-MAPbI <sub>3</sub>                                    | 1.02            | 10.32 nA                                    | -                                                          | 0.25 x 0.25 cm <sup>2</sup>   | <sup>6</sup>     |
| [BnNMe <sub>3</sub> ] <sub>2</sub> CdBr <sub>4</sub> /PDMS                | 52.9            | 0.23 $\mu\text{A cm}^{-2}$                  | 13.8 $\mu\text{W cm}^{-2}$                                 | 3 x 3 cm <sup>2</sup>         | <sup>7</sup>     |
| [BnNMe <sub>2</sub> <sup>n</sup> Pr] <sub>2</sub> CdBr <sub>4</sub> /PDMS | 63.8            | 0.59 $\mu\text{A cm}^{-2}$                  | 37.1 $\mu\text{W cm}^{-2}$                                 | 3 x 3 cm <sup>2</sup>         | <sup>7</sup>     |
| (TMFM)FeBr <sub>4</sub>                                                   | 2.2             | -                                           | -                                                          | -                             | <sup>8</sup>     |
| [Ph <sub>3</sub> MeP] <sub>4</sub> [Ni(NCS) <sub>6</sub> ]/TPU            | 19.29           | 3.59 $\mu\text{A cm}^{-2}$                  | 2.51 mW cm <sup>-3</sup><br>(50.26 $\mu\text{W cm}^{-2}$ ) | 1.3 x 3 cm <sup>2</sup>       | <sup>9</sup>     |
| [Ph <sub>3</sub> MeP] <sub>2</sub> [CuCl <sub>4</sub> ]/TPU               | 25              | 1.1 $\mu\text{A cm}^{-2}$                   | 14.1 $\mu\text{W cm}^{-2}$                                 | 1.2 x 3 cm <sup>2</sup>       | <sup>10</sup>    |
| <b>15 wt% 1-S-PLA</b>                                                     | <b>10.4</b>     | <b>0.5 <math>\mu\text{A cm}^{-2}</math></b> | <b>5.26 <math>\mu\text{W cm}^{-2}</math></b>               | <b>1.2 x 3 cm<sup>2</sup></b> | <b>This work</b> |

**Note:** MAPbI<sub>3</sub> = methylammonium lead iodide; PVDF = polyvinylidene difluoride; PDMS = polydimethylsiloxane; FAPbBr<sub>3</sub> = formamidinium lead bromide; PLLA = poly(L-lactic acid); SnO<sub>2</sub> = tin oxide; NF = nanofiber; [BnNMe<sub>3</sub>]<sub>2</sub>CdBr<sub>4</sub> = N,N,N-trimethyl-1-phenylmethanaminium cadmium(II) bromide; [BnNMe<sub>2</sub><sup>n</sup>Pr]<sub>2</sub>CdBr<sub>4</sub> = N-benzyl-N,N-dimethylpropan-1-aminium cadmium(II) bromide; (TMFM)FeBr<sub>4</sub> = trimethylfluoromethylammonium iron(III)bromide, TPU = thermoplastic polyurethane, PLA = polylactic acid .

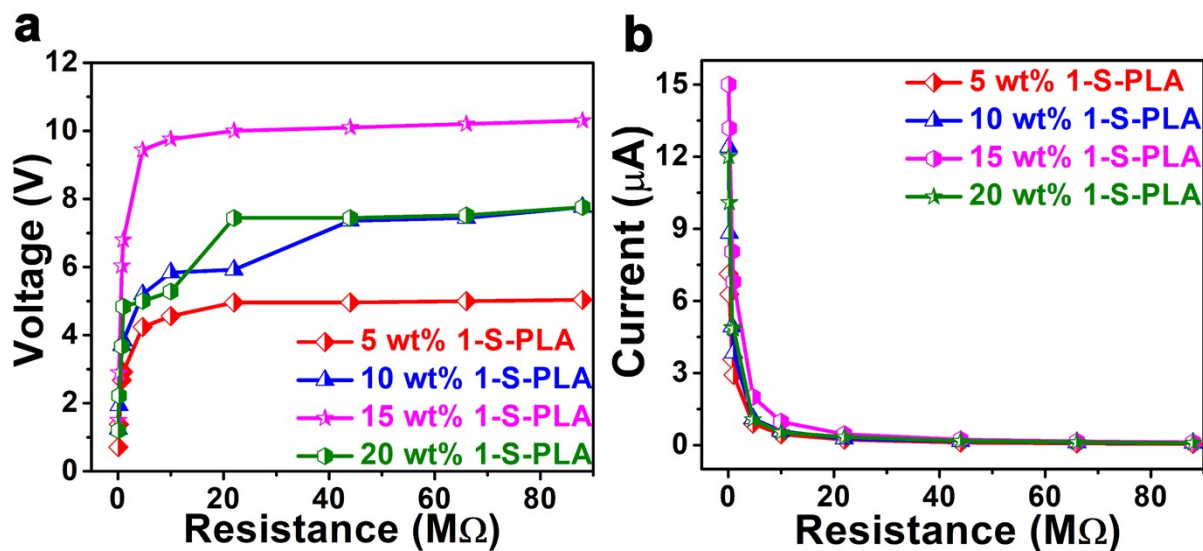

Figure S14. The comparative output (a) voltage and (b) current data for all the 1-S-PLA composite devices under various load resistances.

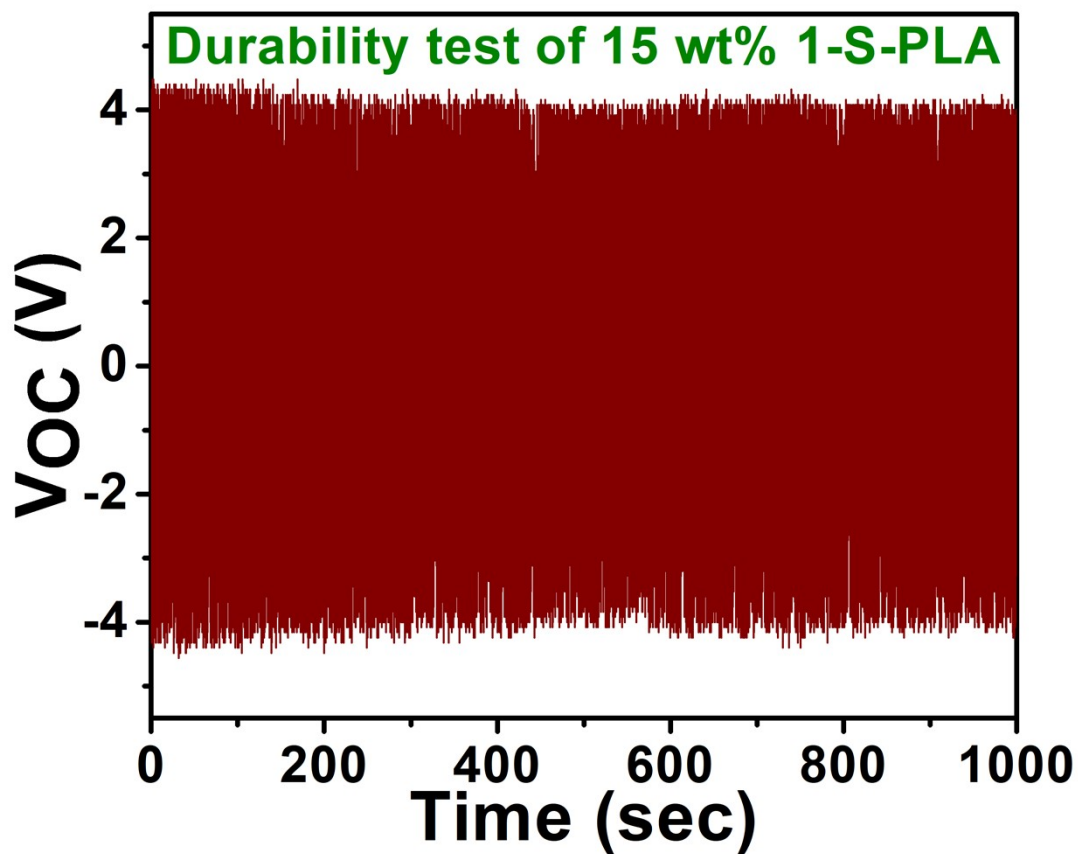

Figure S15. Fatigue test for the 15 wt% 1-S-PLA composite device up to 10000 cycles.

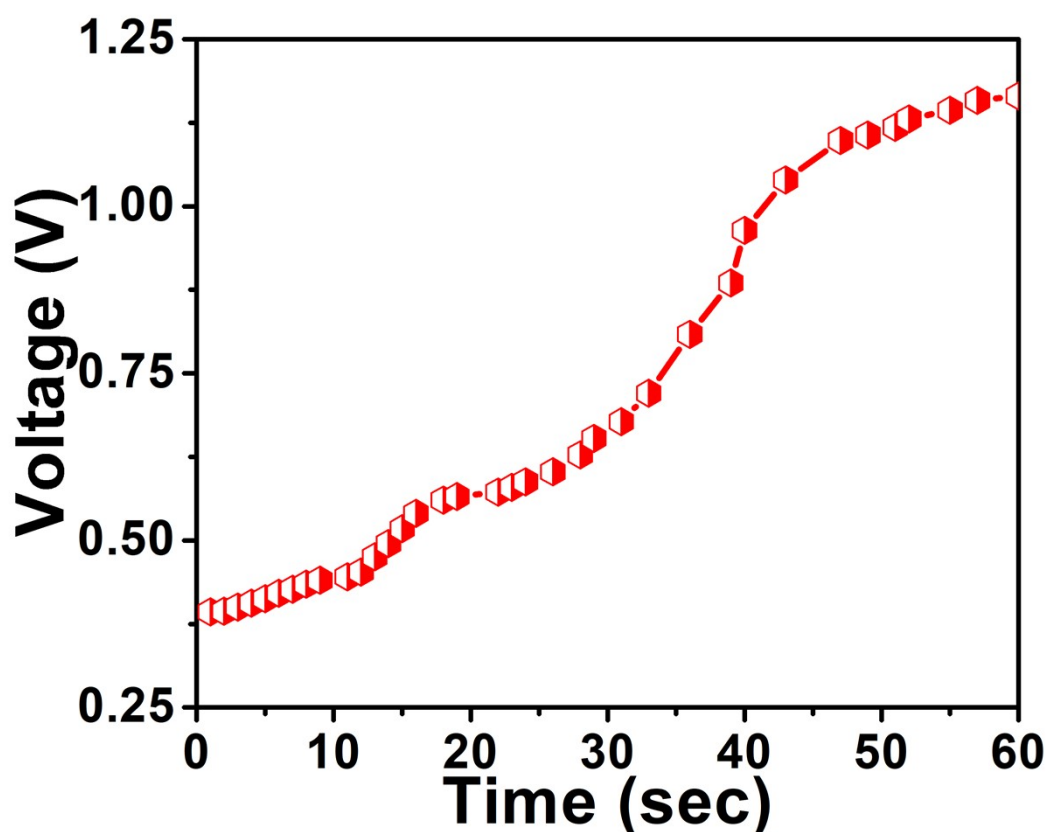

**Figure S16.** Stored voltages in a 100  $\mu\text{F}$  capacitor by employing the 15 wt % 1-S-PLA composite device at different time intervals.

## References

1. V. Jella, S. Ippili, J.-H. Eom, J. Choi and S.-G. Yoon, *Nano Energy*, 2018, **53**, 46-56.
2. A. Sultana, M. M. Alam, P. Sadhukhan, U. K. Ghorai, S. Das, T. R. Middy and D. Mandal, *Nano Energy*, 2018, **49**, 380-392.
3. Y.-J. Kim, T.-V. Dang, H.-J. Choi, B.-J. Park, J.-H. Eom, H.-A. Song, D. Seol, Y. Kim, S.-H. Shin, J. Nah and S.-G. Yoon, *Journal of Materials Chemistry A*, 2016, **4**, 756-763.
4. R. Ding, H. Liu, X. Zhang, J. Xiao, R. Kishor, H. Sun, B. Zhu, G. Chen, F. Gao, X. Feng, J. Chen, X. Chen, X. Sun and Y. Zheng, *Advanced Functional Materials*, 2016, **26**, 7708-7716.
5. Y. Li, M.-h. Xu, Y.-s. Xia, J.-m. Wu, X.-k. Sun, S. Wang, G.-H. Hu and C.-x. Xiong, *Chemical Engineering Journal*, 2020, **388**, 124205.
6. R. Tusiime, F. Zabihi, M. Tebyetekerwa, Y. M. Yousry, Y. Wu, M. Eslamian, S. Yang, S. Ramakrishna, M. Yu and H. Zhang, *Journal of Materials Chemistry C*, 2020, **8**, 2643-2658.
7. S. Deswal, S. K. Singh, P. Rambabu, P. Kulkarni, G. Vaitheeswaran, B. Praveenkumar, S. Ogale and R. Boomishankar, *Chemistry of Materials*, 2019, **31**, 4545-4552.
8. Y. Zhang, X.-J. Song, Z.-X. Zhang, D.-W. Fu and R.-G. Xiong, *Matter*, 2020, **2**, 697-710.
9. T. Vijayakanth, F. Ram, B. Praveenkumar, K. Shanmuganathan and R. Boomishankar, *Angewandte Chemie International Edition*, 2020, **59**, 10368-10373.
10. S. Sahoo, T. Vijayakanth, P. Kothavade, P. Dixit, J. K. Zaręba, K. Shanmuganathan and R. Boomishankar, *ACS Materials Au*, 2022, **2**, 124-131.
